# Supplementary material for: Targeting RAF Isoforms and Tumor Microenvironments in RAS or BRAF Mutant Colorectal Cancers with SJ-C1044 for Anti-Tumor Activity
Source: MDPI journal article supplement (doi:10.3390/cimb45070371), 2023-07-13
Supplement: s1 [file s1]

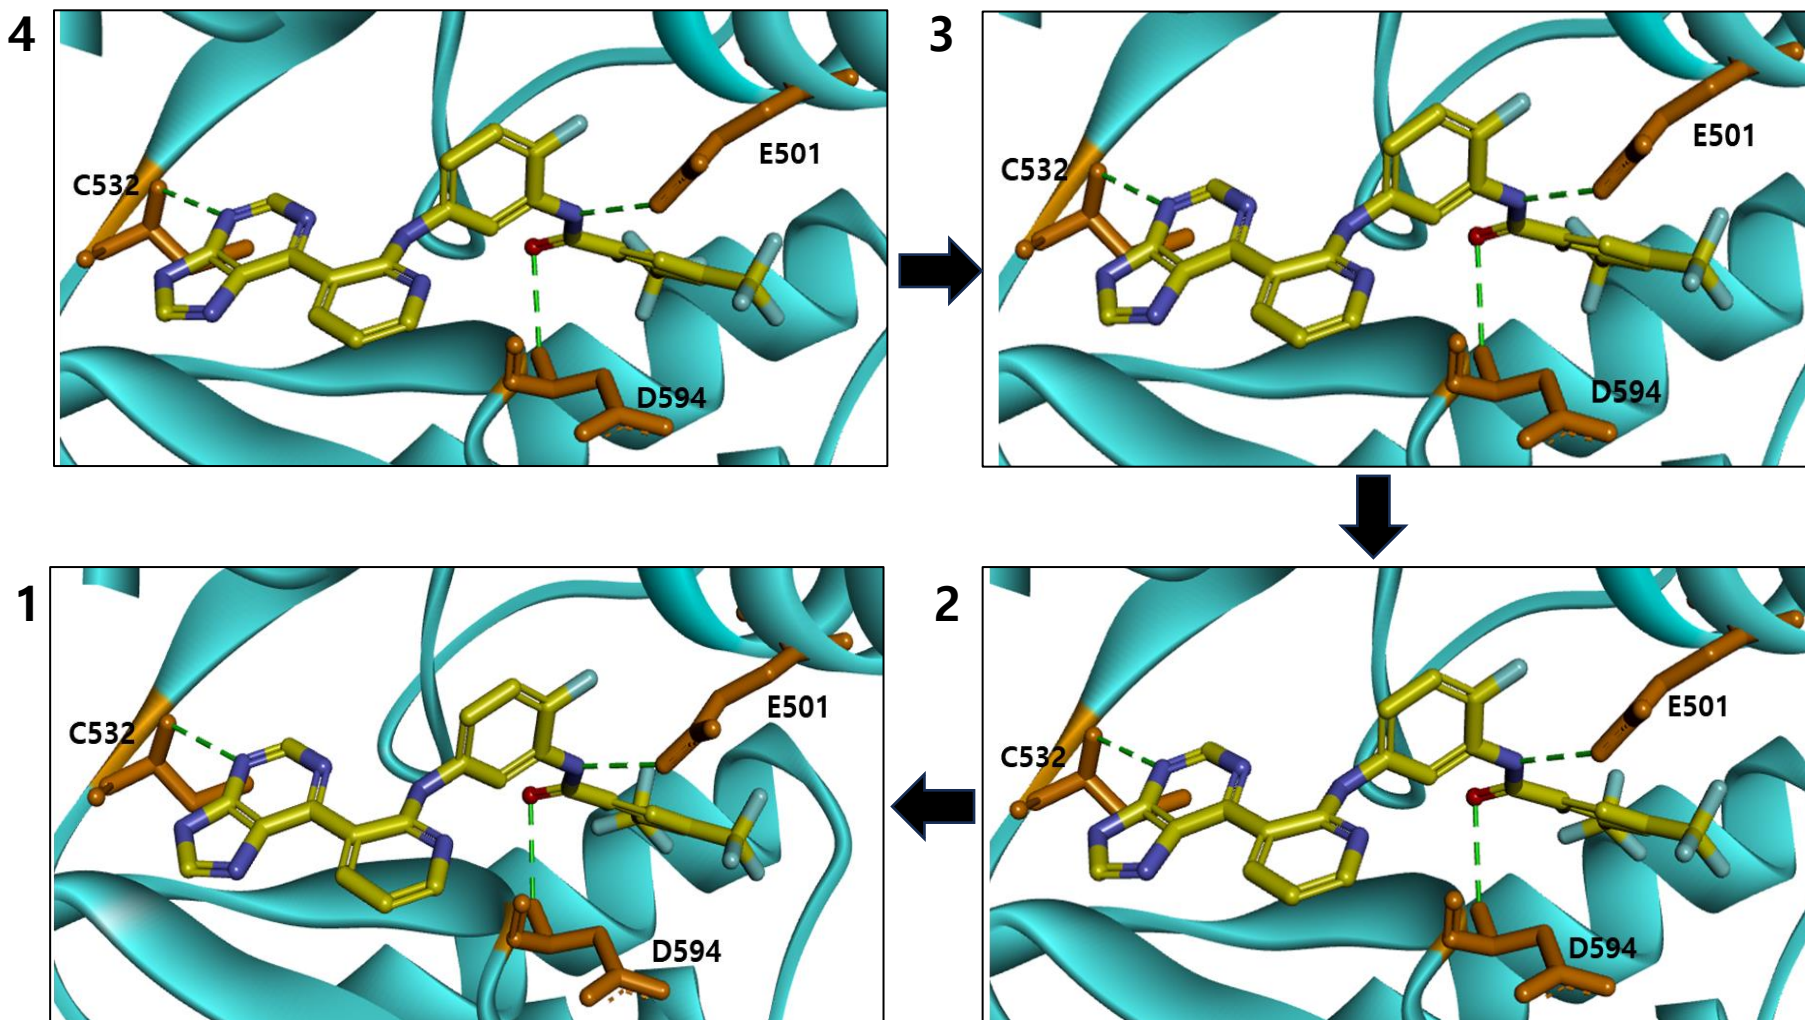

| Binding Mode in BRAFV600E | CDOCKER Energy  | CDOCKER Interaction Energy |
|---------------------------|-----------------|----------------------------|
| 4                         | -28.1283        | -63.1195                   |
| 3                         | -28.1671        | -62.589                    |
| 2                         | -28.5095        | -63.1158                   |
| 1                         | <b>-28.7647</b> | <b>-63.2025</b>            |

### Supplementary Figure S1. Binding Modes of SJ-C1044 in BRAF V600E (PDB Code: 5C9C).

The binding modes of SJ-C1044 and BRAF V600E were determined using Discovery Studio software. The binding energy was subsequently calculated and optimized. Among the identified binding modes, the predicted binding mode is designated as mode 1 due to its lowest CDOCKER Energy value.

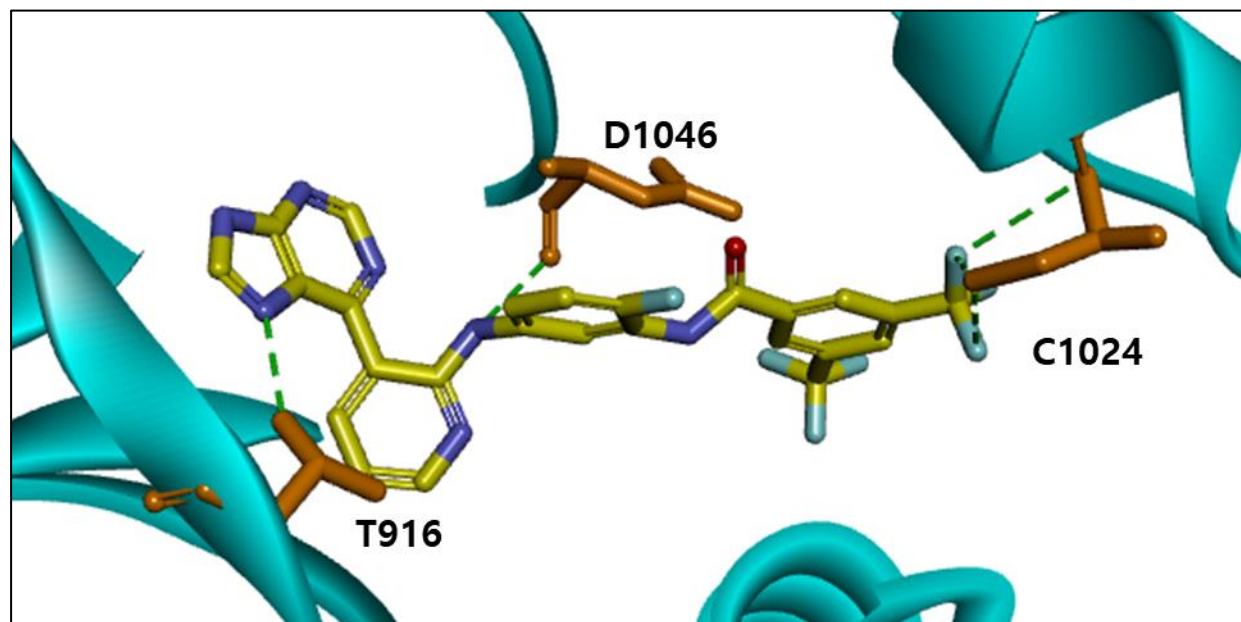

| Binding Mode in VEGFR2 | CDOCKER Energy | CDOCKER Interaction Energy |
|------------------------|----------------|----------------------------|
|                        | -18.9631       | -54.6837                   |

**Supplementary Figure S2. Binding Modes of SJ-C1044 in VEGFR2 (PDB Code: 3CP9)** The binding modes of SJ-C1044 and VEGFR2 was determined using Discovery Studio software. The binding energy was subsequently calculated and optimized

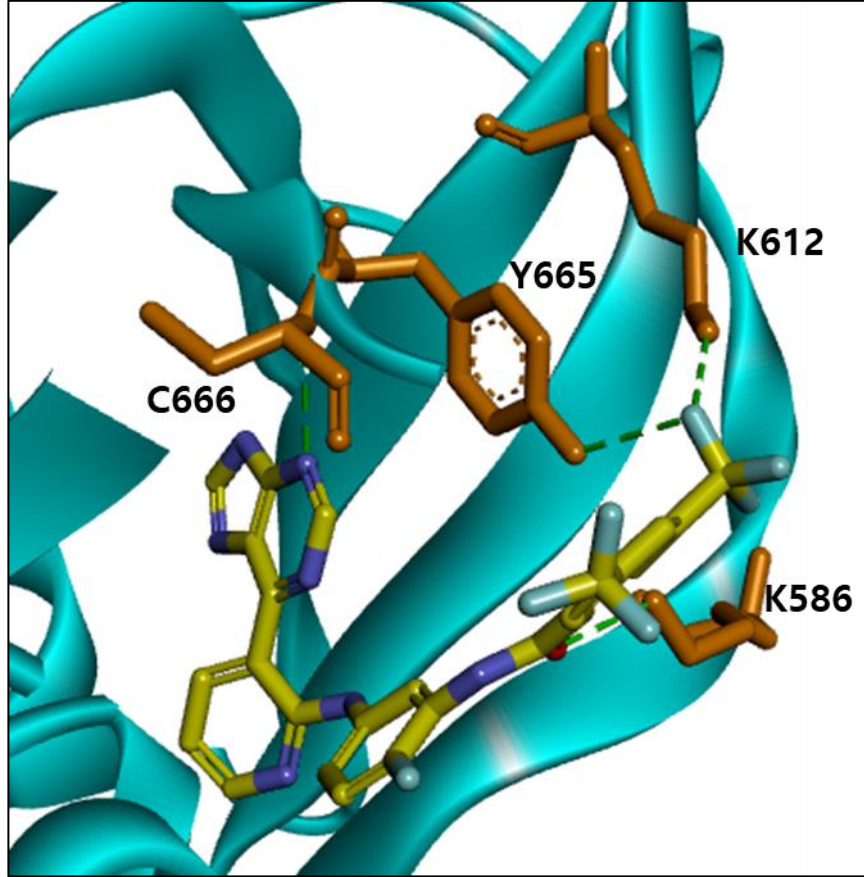

| Binding Mode in CSF1R | CDOCKER Energy | CDOCKER Interaction Energy |
|-----------------------|----------------|----------------------------|
|                       | -18.426        | -51.4336                   |

**Supplementary Figure S3. Binding Modes of SJ-C1044 in CSF1R (PDB Code: 3KRL)** The binding modes of SJ-C1044 and CSF1R was determined using Discovery Studio software. The binding energy was subsequently calculated and optimized

| Supplementary Table S1 |                       |                          |
|------------------------|-----------------------|--------------------------|
|                        | SJ-C1044 @ 10 $\mu$ M | Kinase<br>(% inhibition) |
| 1                      | TIE2                  | 97                       |
| 2                      | VEGFR2                | 91                       |
| 3                      | c-RAF(h)              | 86                       |
| 4                      | B-Raf(V600E)(h)       | 80                       |
| 5                      | CSF1R(h)              | 70                       |
| 6                      | B-Raf(h)              | 68                       |
| 7                      | FGFR3(h)              | 48                       |
| 8                      | A-Raf(h)              | 44                       |
| 9                      | cSRC(h)               | 38                       |
| 10                     | PI3Kinase(p110a(H10   | 37                       |
| 11                     | Fyn(h)                | 27                       |
| 12                     | PI3Kinase(p110a(E54   | 24                       |
| 13                     | PI3Kinase(p110a/p85   | 23                       |
| 14                     | PI3Kinase(p110a(E54   | 20                       |
| 15                     | BTK(h)                | 18                       |
| 16                     | Yes(h)                | 17                       |
| 17                     | PKB $\alpha$ (h)      | 15                       |
| 19                     | Met(h)                | 13                       |
| 20                     | ATM(h)                | 12                       |

|    |                     |    |
|----|---------------------|----|
| 21 | PDGFR $\beta$ (h)   | 11 |
| 22 | PKC $\iota$ (h)     | 11 |
| 23 | CDK7/cyclinH/MAT1   | 10 |
| 24 | PKC $\beta$ II(h)   | 10 |
| 25 | MST2(h)             | 9  |
| 26 | p70S6K(h)           | 8  |
| 27 | ATR/ATRIP(h)        | 8  |
| 28 | PKC $\theta$ (h)    | 5  |
| 29 | CK1(y)              | 4  |
| 30 | Rsk3(h)             | 4  |
| 31 | Aurora-A(h)         | 3  |
| 32 | CSK(h)              | 3  |
| 33 | Flt3(h)             | 3  |
| 34 | PAR-1B $\alpha$ (h) | 3  |
| 35 | PKC $\eta$ (h)      | 3  |
| 36 | PKD2(h)             | 3  |
| 37 | CaMKIV(h)           | 2  |
| 38 | CDK2/cyclinE(h)     | 2  |
| 39 | PKB $\gamma$ (h)    | 2  |
| 40 | MEK1(h)             | 1  |
| 41 | PKB $\beta$ (h)     | 1  |
| 42 | PKC $\gamma$ (h)    | 1  |
| 43 | PKC $\zeta$ (h)     | 1  |
